# Supplementary material for: Arbuscular Mycorrhizal Fungal 14-3-3 Proteins Are Involved in Arbuscule Formation and Responses to Abiotic Stresses During AM Symbiosis
Source: PubMed Central journal article supplement (PMC5844941; doi:10.3389/fmicb.2018.00091), 2018-03-05
Supplement: Image_1.pdf [file Image_1.pdf]

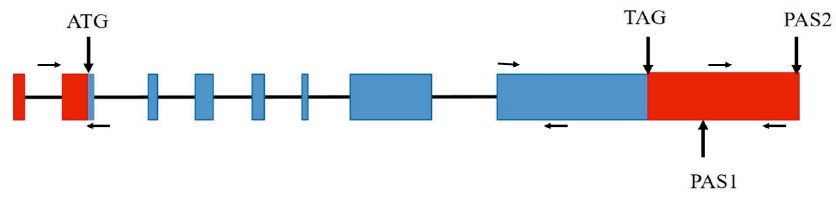

**Figure S1. Gene structure of *Fm201***

*Fm201* gene contains seven exons and seven introns. Blue boxes stand for exons, red boxes stand for the UTRs, lines between the boxes stand for introns; ATG and TAG indicate start codon and stop codon, respectively. PAS1 and PAS2 stand for the two polyadenylation signals, indicative of two distinct 3' UTRs in *Fm201* gene, while the arrows indicate the specific primers for isolation of the sequence of *Fm201* UTRs.

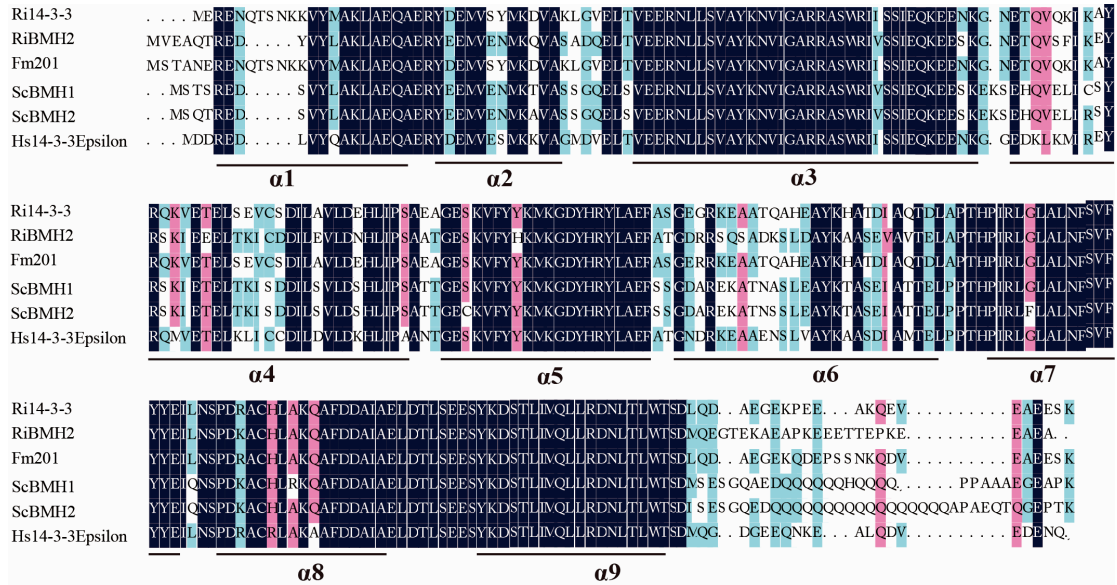

**Figure S2. Multiple amino acid sequence alignment among Fm201, Ri14-3-3, RiBMH2, ScBMH1, ScBMH2 and Hs14-3-3ε.**

Amino acid sequences with highlighted lines represent 9 predicted  $\alpha$ -helices.

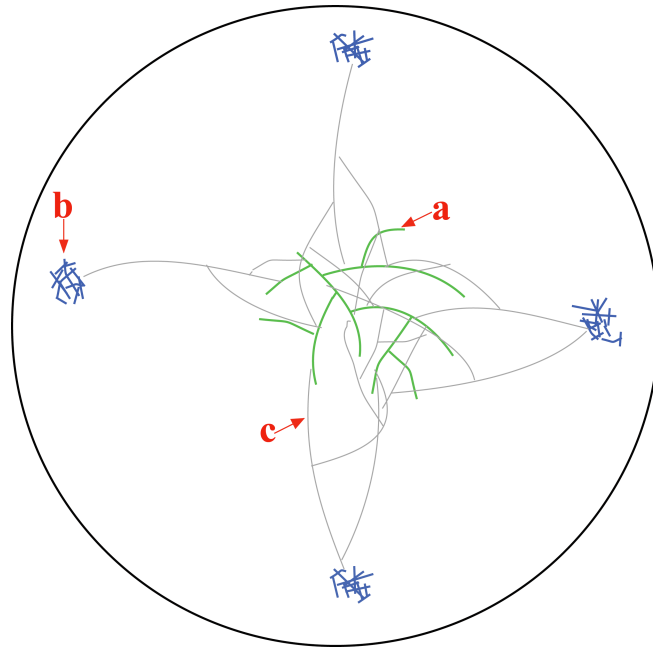

**Figure S3. Schematic diagram of HIGS experiment design in petri dishes system.**

Culture a represents hairy roots of *M. truncatula* harboring the RNAi vector grown on MS medium. Culture b indicates the infected hairy roots of *Petroselinum crispum* with *Rhizophagus irregularis* as the inocula. Culture c shows the growing extraradical hyphae from mycorrhizal roots of *Petroselinum crispum* toward the roots of *M. truncatula*. 30 days after inoculation, the mycorrhizal roots of *M. truncatula* with Ri14-3-3 RNAi vector were collected for subsequent colonization and gene expression analyses.

**Table S1. Yeast Strains used in this study**

| Strain                      | Genotype                                                                          |
|-----------------------------|-----------------------------------------------------------------------------------|
| BY4741                      | MATa.his3Δ1.leu2Δ0.met15Δ0.ura3Δ0                                                 |
| BY4741-pMRI-12              | MATa.his3Δ1.leu2Δ0.met15Δ0.ura3Δ0.KanMX                                           |
| <i>Bmh1-Fm201</i>           | MATa.his3Δ1.leu2Δ0.met15Δ0.ura3Δ0.BMH1::KanMX(Gal7[ <i>Fm201</i> ])               |
| <i>bmh1-Fm201</i> -pSH47    | MATa.his3Δ1.leu2Δ0.met15Δ0.ura3Δ0.BMH1::KanMX(Gal7[ <i>Fm201</i> ]).ura3          |
| <i>bmhs-Fm201</i>           | MATa.his3Δ1.leu2Δ0.met15Δ0.ura3Δ0.BMH1::KanMX(Gal7[ <i>Fm201</i> ]).BMH2::ura3    |
| <i>bmh1-Ri14-3-3</i>        | MATa.his3Δ1.leu2Δ0.met15Δ0.ura3Δ0.BMH1::KanMX(Gal7[ <i>Ri14-3-3</i> ])            |
| <i>bmh1-Ri14-3-3</i> -pSH47 | MATa.his3Δ1.leu2Δ0.met15Δ0.ura3Δ0.BMH1::KanMX(Gal7[ <i>Ri14-3-3</i> ]).ura3       |
| <i>bmhs-Ri14-3-3</i>        | MATa.his3Δ1.leu2Δ0.met15Δ0.ura3Δ0.BMH1::KanMX(Gal7[ <i>Ri14-3-3</i> ]).BMH2::ura3 |
| <i>Bmh1-RiBMH2</i>          | MATa.his3Δ1.leu2Δ0.met15Δ0.ura3Δ0.BMH1::KanMX(Gal7[ <i>RiBMH2</i> ])              |
| <i>bmh1-RiBMH2</i> -pSH47   | MATa.his3Δ1.leu2Δ0.met15Δ0.ura3Δ0.BMH1::KanMX(Gal7[ <i>RiBMH2</i> ]).ura3         |
| <i>bmhs-RiBMH2</i>          | MATa.his3Δ1.leu2Δ0.met15Δ0.ura3Δ0.BMH1::KanMX(Gal7[ <i>RiBMH2</i> ]).BMH2::ura3   |

**Table S2. Primers used in this study**

| Primers              | Sequences (5'-3')                                         | Primers   | Sequences (5'-3')                                                              |
|----------------------|-----------------------------------------------------------|-----------|--------------------------------------------------------------------------------|
| 1433F                | CGCTGAGCAAGCCGAACG                                        | 201ATGF3  | GATTCCCATGGTGACCTCTAATAAAAAGGT                                                 |
| 1433R                | AGTCCAAAAGGGTCAAGTTATC T                                  | 201TAGR2  | CTAATTATGGATCCTTTGATTCCTCAGCTTCG                                               |
| 201spF1              | TGGGGAGGAGAAAGGAATGTTTGTG                                 | 201F      | TCACTGTGGAGGAACGTAATCT                                                         |
| P <sub>cell7</sub> F | CCCAGACTCTTTGCCAGCTTACTATCCCTTC                           | 201spR2   | AACAAACATTCCTTTCTCTCCCCAT                                                      |
| P <sub>cell7</sub> R | CTCACTAGTTTTTGGAGGAATATCAACTGTT                           | pMRI-12F1 | CTTTATTCCGGCCTGGAGTCAAAGAGGAAGCTCGGTGGCAA<br>AT TTTGCCAGCTTACTATCCTTCTT        |
| FmAct                | CCTCACGCCATTCTTCGAC                                       | pMRI-12R1 | ACATATATAGATATAGATAATAATTCGAATAATGAACTACAA<br>ATTATTACATGTTCTTCTCGCGTTATCCCTCG |
| FmAct                | CAGCGGTTTGCATTCTTGT                                       | pSH47F    | GGGGGAAAAGCAAAGAACGAGAAAACCTGGACAGAAGGTTA<br>ATACTCTAGATTGTAAGTACTGAGAGTGCAC   |
| 201F                 | TCACTGTGGAGGAACGTAATCT                                    | pSH47R    | CTGGAGTGGTAAATCTTCAATTTCCCTTGTATTTCTCAGCGCTC<br>TTATTGGTTGTGTGCGGTATTTACACCCGC |
| 201R                 | TCAGCAATGGCAATCAACAAA                                     | BMH1upF   | GCTTACTAGCCGGCTAGG                                                             |
| QI                   | CCAGTGAGCAGAGTGACGAGGACTCGAGCTC<br>AAGCTTTTTTTTTTTTTTTTTT | BMH1downR | GTAAGATACAGGTGCGACAAAC                                                         |
| QC                   | CCAGTGAGCAGAGTGACGAGGACTCGAGCTC<br>AAGCCCCCCCCCCCCCCCCC   | BMH2upF   | GAGATAATAATACAGCG                                                              |
| QO                   | CCAGTGAGCAGAGTGACG                                        | BMH2downR | GAGGTGCGTATACAATGG                                                             |
| QI                   | GAGGACTCGAGCTCAAGC                                        | 201PR2    | GGTACCATGGTGTGAAAAAAAACGGAATAATTT                                              |
| Ri14-3-3F            | GCAAGCCGAACGTTATGATG                                      | Fm201RTF  | CGGGTGAAAGACGAAAAGAAGC                                                         |
| Ri14-3-3R            | GGCAAGGATATCCGAGCATAC                                     | Fm201RTR  | CAAGTCCGAGACGAATAGGATGAGT                                                      |
| RiBMH2AIG            | ATGGTTCGAAGCTCAAAACAC                                     | UraF      | AGGCGGCAGAAGAAGTAACA                                                           |
| RiBMH2TAA            | TTAAGCTTCTGCTTCTTCCTTG                                    | UraR      | AATGCGTCTCCCTTGTATC                                                            |
